# Supplementary material
Source: PubMed Central journal article supplement (PMC3145406)
Supplement: NIHMS310033-supplement-Supplementary_1.pdf [file NIHMS310033-supplement-Supplementary_1.pdf]

**Supplemental Material and Methods:****Antibodies:**

Antibodies for immunoblot and IP were as follows: murine HIF-1 $\alpha$  (Mansfield et al., 2005), human HIF-1 $\alpha$  (BD Biosciences), murine and human HIF-2 $\alpha$  (Novus NB 100-122 and 100-132), Actin (Sigma AC-15), Creb (Cell Signaling), p21 (Santa Cruz C-19), p27 (Santa Cruz F-8), E2F1 (Santa Cruz C-20), Cyclin D2 (Santa Cruz C-17), CDK2 (Santa Cruz M2), Akt (Cell Signaling), c-Myc (Santa Cruz N-262 and C-33), Sp1 (Santa Cruz H-225 and E-3), Miz1 (Santa Cruz H-190 and G-18), Max (Santa Cruz C-17 and H-2) and Mad1 (Santa Cruz C-19 and F-1).

**Chromatin IP**

Chromatin IP was performed as has been described with some minor modifications (Letting et al., 2003). Cells were fixed with 1% formaldehyde for 10 minutes at 37°C, and nuclear extracts were obtained and sonicated to produce DNA of approximately 600 bp. Specific IP was performed with antibodies against HIF-1 $\alpha$  (Novus NB 100-105), HIF-2 $\alpha$  (Novus NB 100-122), c-Myc (Santa Cruz N-262), p53 (Oncogene Ab-6) or Myctag (Santa Cruz A-14), as well as isotype matched controls (for mouse IgG2a and IgG2b from Becton Dickinson; for rabbit IgG from Upstate). Analysis was performed with SYBR green, with input DNA as the endogenous control.

**Transformation Assays**

Primary MEFs were generated from day 14 C57-BL/6 embryos. At passage 4, cells were transfected with pBabe-puro, pBabe-puro-RasV12G and pBabe-puro-Myc, pCDNA3.1-Flag, pCDNA3.1-DPM-HIF-1 $\alpha$ -FLAG, and pCDNA-HIF-2 $\alpha$ -FLAG, and MSCV-GFP (the kind gift of Russell Jones) with Lipofectamine 2000 (Invitrogen). They were allowed to grow to confluence, and maintained in culture for 30 days with media changes every 3 days (for this period 5% FBS was used instead of 10% FBS). Transfections were performed in sextuplicate, with four plates stained with Wright-Giemsa and foci counted and two plates used to isolate foci to establish cell lines.

**Supplemental Figure 1.** Hypoxic HCT116 and WT8 cells induce HIF target genes consistent with their HIF- $\alpha$  subunit expression. Expression of common HIF target VEGF (A), and HIF-1 $\alpha$  and HIF-2 $\alpha$  specific gene targets PGK (B) and Oct4 respectively (C) following 24, 48 or 72 hrs. at 0.5% O<sub>2</sub>. Results measured by QRT-PCR and averaged from 4 experiments are shown, error bars  $\pm$ 1 SEM.
