# Supplementary material
Source: PubMed Central journal article supplement (PMC3145406)
Supplement: NIHMS310033-supplement-Supplementary_2.pdf [file NIHMS310033-supplement-Supplementary_2.pdf]

**Supplemental Figure 2.** Hypoxic shRNA transduced RCC4 cells induce HIF and c-Myc target genes consistent with their HIF- $\alpha$  subunit expression. **A.** Expression of VEGF, PGK and Oct4 as described above. Results measured by QRT-PCR and averaged from 4 experiments, error bars  $\pm 1$  SEM. **B.** Summary of cell cycle progression by % in S-phase in RCC4 cell lines measured by BrdU incorporation after 24 or 48 hrs. at 0.5% O<sub>2</sub>. Results averaged from 3 experiments error bars  $\pm 1$  SEM, \*\* p < 0.01. **C.** Proliferation in empty vector clones, measured by serial cell counts; data from one representative experiment. Error  $\pm 1$  SD. **D.** Expression of p27 and Cyclin D2 mRNA as described above. Results measured by QRT-PCR and averaged from 4 experiments, error bars  $\pm 1$  SEM. **E.** Expression of p27 and Cyclin D2 protein following 24 hrs. 0.5% O<sub>2</sub>. Actin loading control is shown in Figure 2C.

**Supplemental Figure 3.** EC lines recapitulate HIF- $\alpha$  effects on c-Myc activity observed in HCT116 and WT8 cells. **A.** Characterization of HIF- $\alpha$  expression in EC lines following 4 hrs. DFX treatment. **B.** Altered expression of VEGF and PGK following 24 or 48 hrs. at 0.5% O<sub>2</sub> in EC lines consistent with transcriptional activity by both HIF-1 $\alpha$  and HIF-2 $\alpha$ . Results measured by QRT-PCR and averaged from 4 experiments, error bars  $\pm 1$  SEM. **C.** Altered p27 and Cyclin D2 expression following 24 or 48 hrs. hypoxia in EC lines consistent with HIF- $\alpha$  expression. Results measured as above. **D.** Western blot analysis of Cyclin D2 and p27 expression in EC lines following 48 hrs. at 0.5% O<sub>2</sub>.

**Supplemental Figure 4.** Direct HIF- $\alpha$  DNA binding is not required for altered c-Myc promoter occupancy. **A.** HCT116 cells were grown at 21% O<sub>2</sub> (N) or 0.5% O<sub>2</sub> (H) for 20 hrs., and then assayed for HIF-1 $\alpha$  binding to c-Myc promoter sites by ChIP as above. The graphs show the fold difference between c-Myc IP and isotype control (background) with results from 4 experiments,  $\pm 1$  SEM. **B.** WT8 cells were treated and analyzed as in A. **C.** Cis-control using primers directed at p53 binding site upstream of p21 promoter reveal specificity of ChIP in HCT116 and WT8 cells.

**Supplemental Figure 5.** c-Myc promoter binding is regulated by HIF-1 $\alpha$  and HIF-2 $\alpha$  in HEK293 cells. **A.** Induction of transgenes encoding stabilized forms of HIF-1 $\alpha$  and HIF-2 $\alpha$  after 24 hrs. doxycycline treatment in Tet-regulatable HEK293 cells. **B.** c-Myc promoter binding after 24 hrs. induction of HIF-1 $\alpha$  or HIF-2 $\alpha$  in Tet-regulatable HEK293 cells. **C.** HEK293 cells were treated and analyzed as above, with Myc-tag IP for Myc-tag-HIF-1 $\alpha$  and Myc-tag-HIF-2 $\alpha$ . **D.** Cis-control using primers directed at p53 binding site upstream of p21 promoter reveal specificity of ChIP in HEK293 cells.

**Supplemental Figure 6.** c-Myc/Max binding is unaltered under normoxia in HIF-1 $\alpha$  and HIF-2 $\alpha$  overexpressing WT8 cells. **A.** Sp1, Miz1, Max, c-Myc and Mad1 expression in HCT116 and WT8 cells grown at 0.5% O<sub>2</sub> for 4 and 20 hrs. **B.** Vector control (V1) and HIF-1 $\alpha$  overexpressing cell lines were cultured at 21% O<sub>2</sub> and Max IP was performed and analyzed for co-precipitated c-Myc. IP control and whole cell lysates are also shown. **C.** Vector control (V1) and HIF-2 $\alpha$  overexpressing cell lines were cultured at 21% O<sub>2</sub> and Max IP was performed and analyzed for co-precipitated c-Myc, with controls as above.
