# Supplementary material
Source: PubMed Central journal article supplement (PMC3145406)

**A**

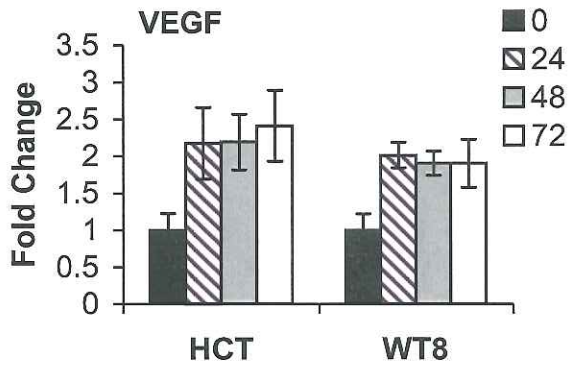

**B**

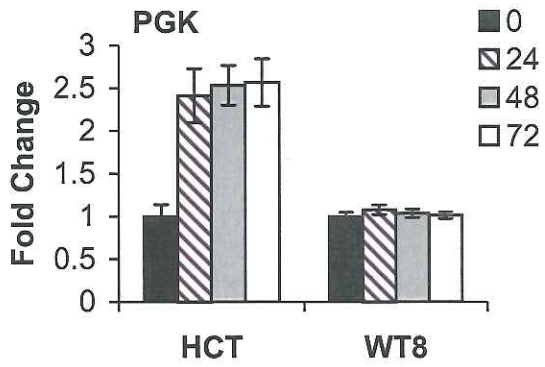

**C**

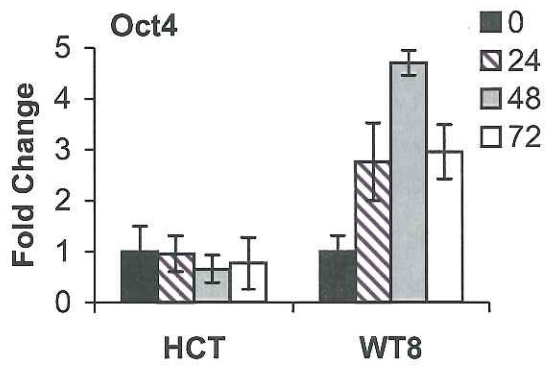

Supplement: NIHMS310033-supplement-SF1.pdf [file NIHMS310033-supplement-SF1.pdf]

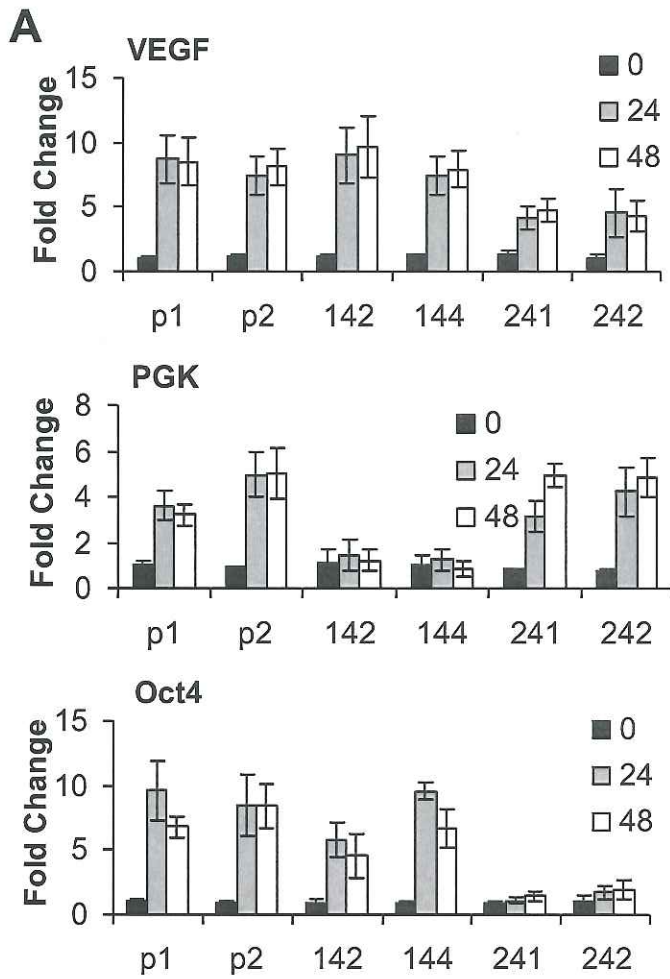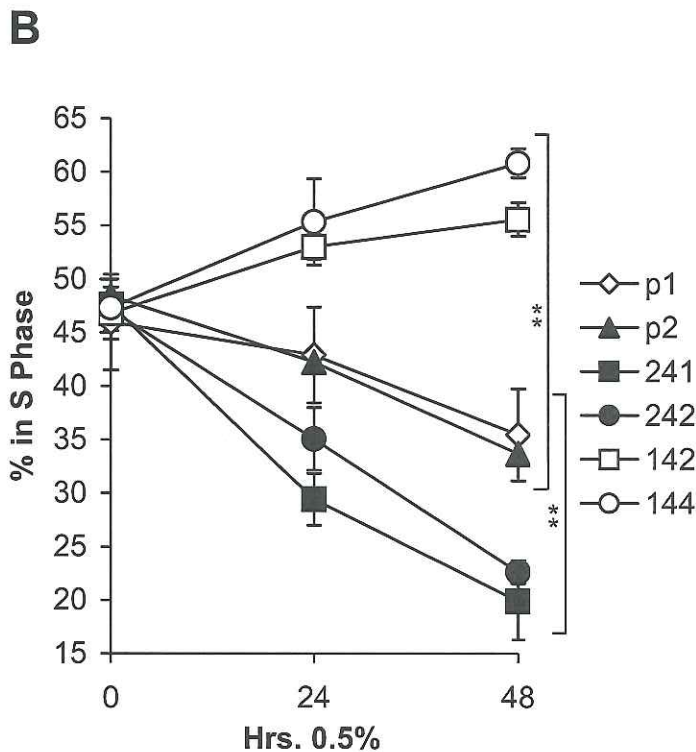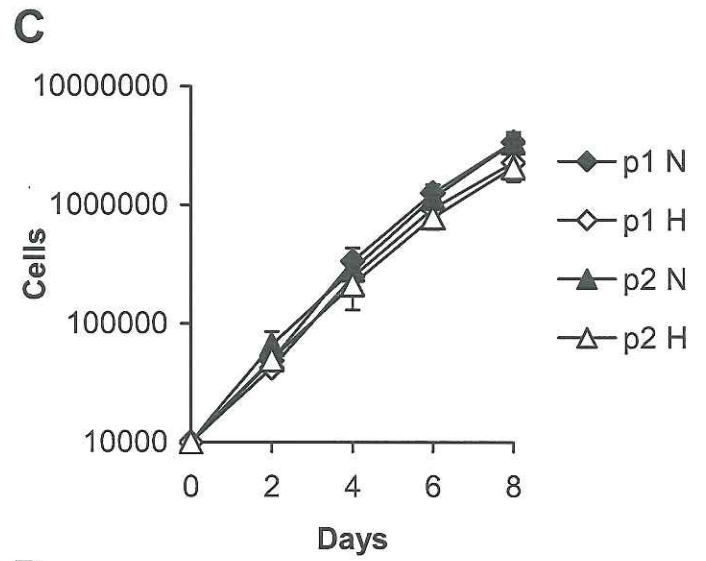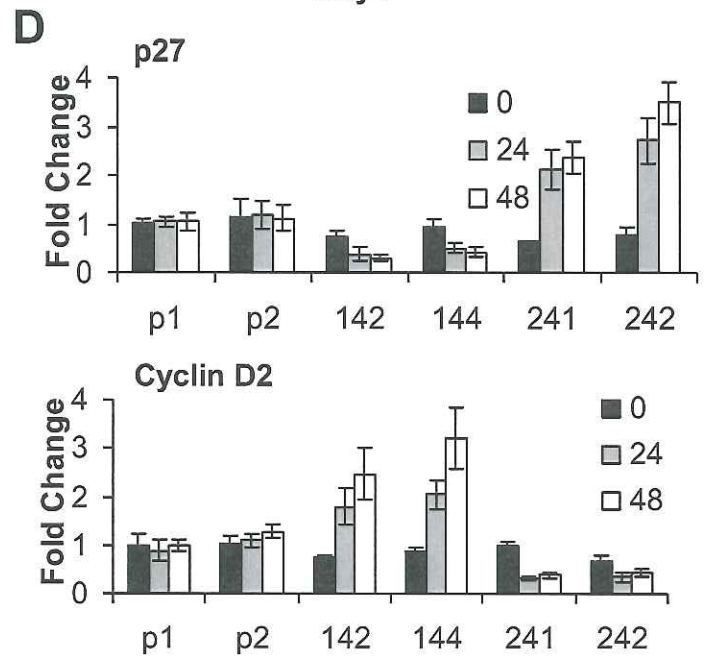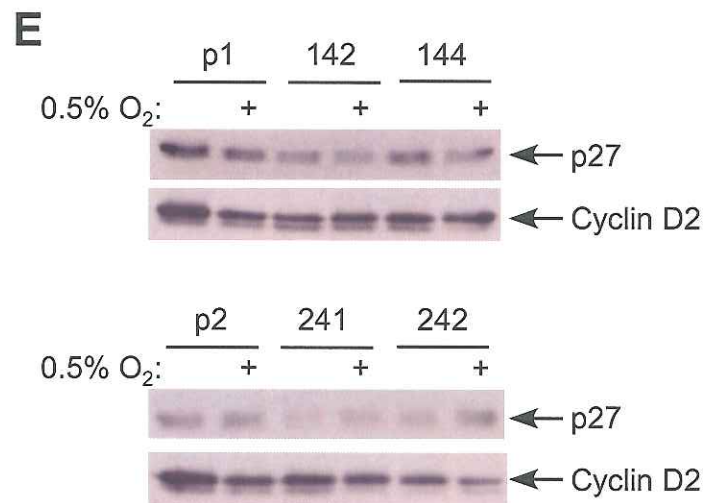

Supplement: NIHMS310033-supplement-SF2.pdf [file NIHMS310033-supplement-SF2.pdf]

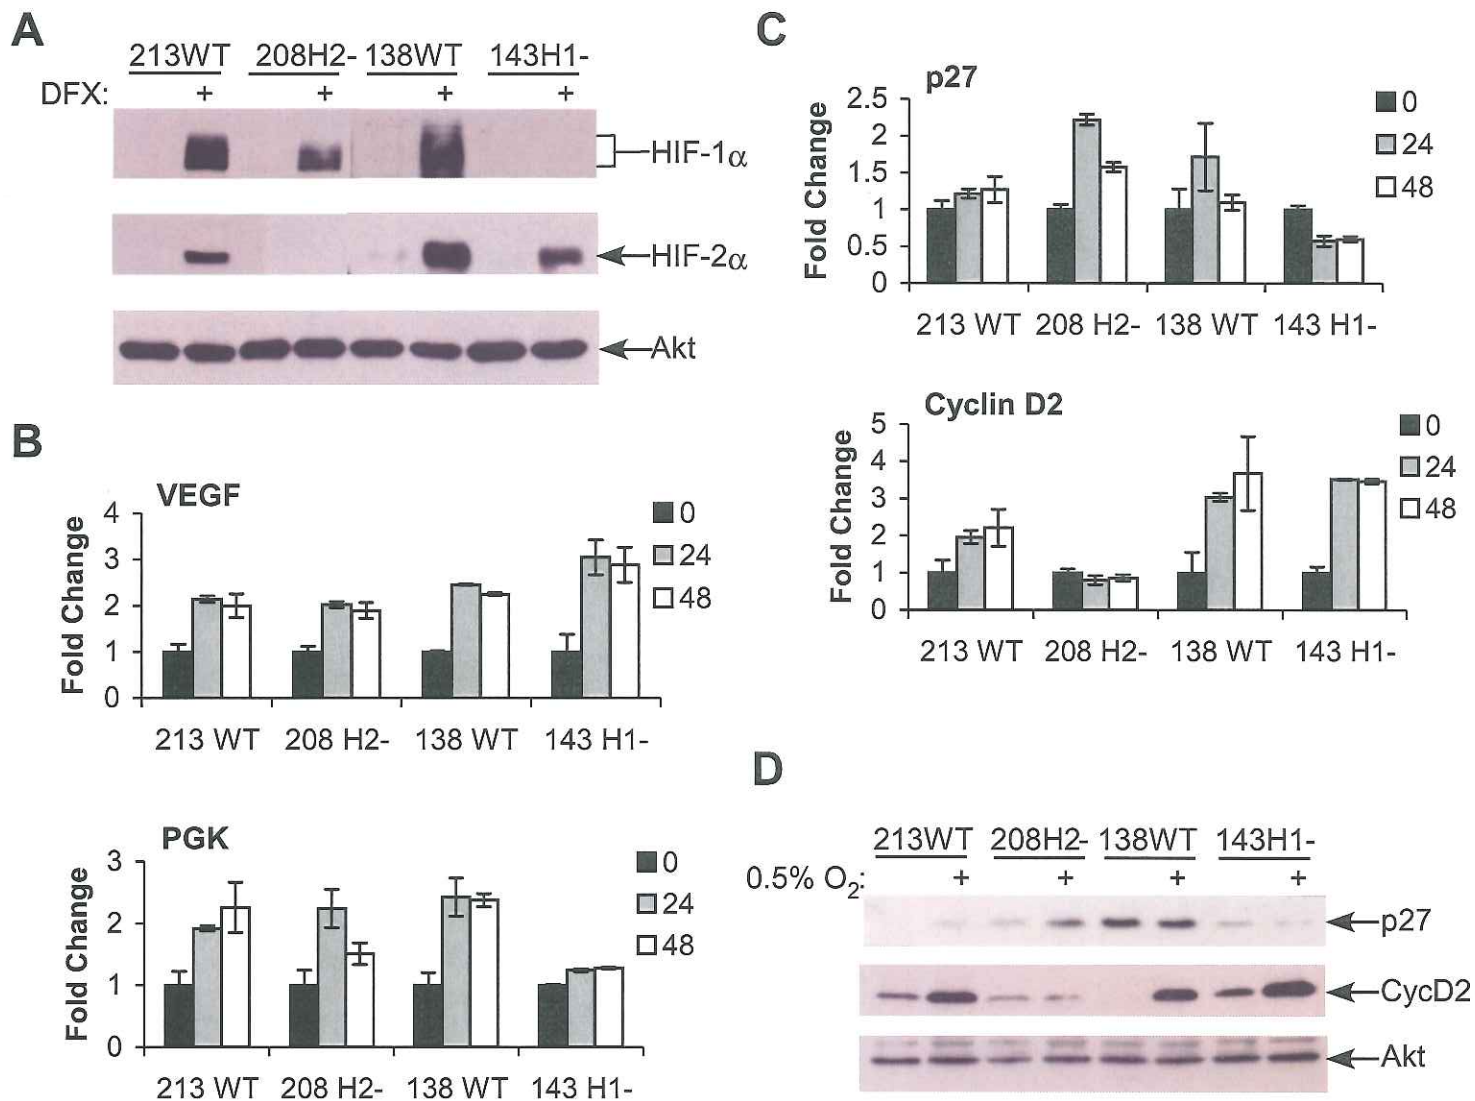

Supplement: NIHMS310033-supplement-SF3.pdf [file NIHMS310033-supplement-SF3.pdf]

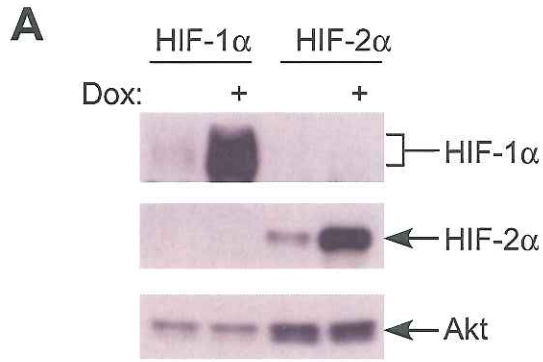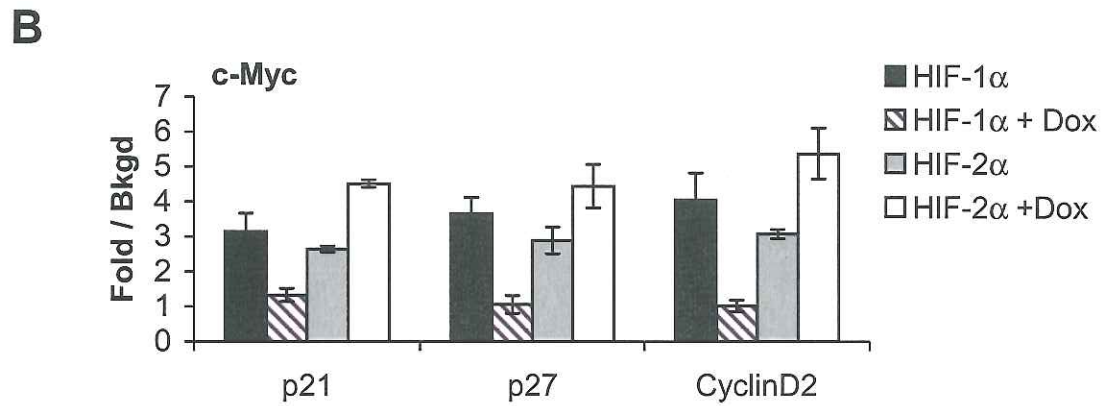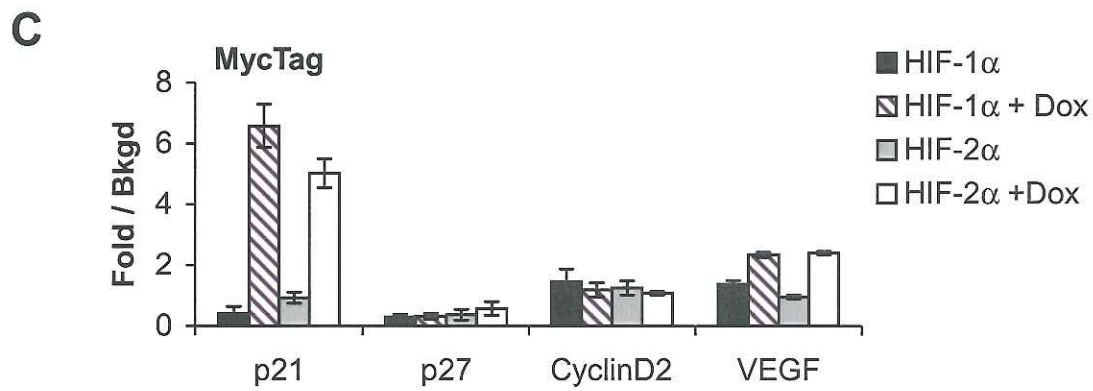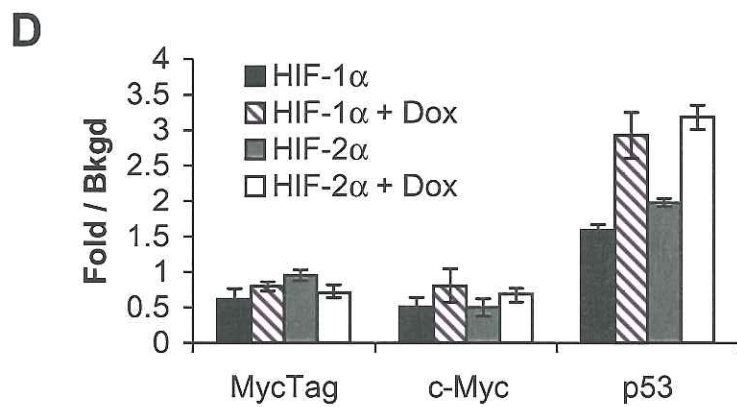

Supplement: NIHMS310033-supplement-SF4.pdf [file NIHMS310033-supplement-SF4.pdf]



Supplement: NIHMS310033-supplement-SF5.pdf [file NIHMS310033-supplement-SF5.pdf]

**A**

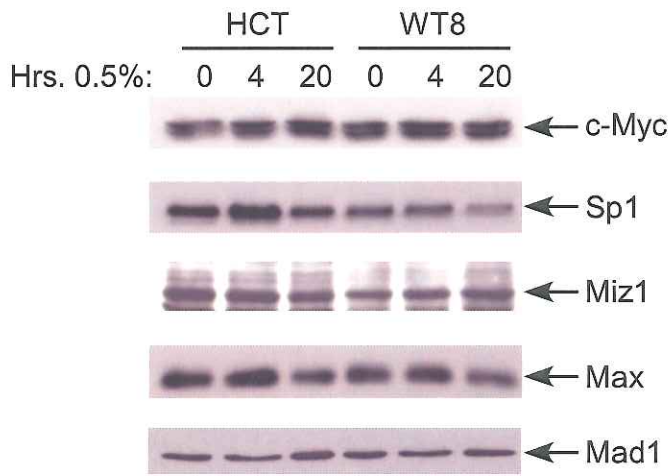

**B**

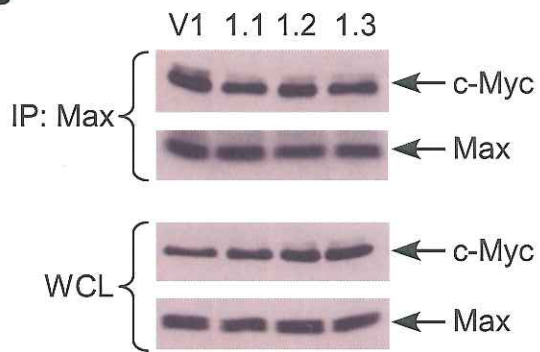

**C**

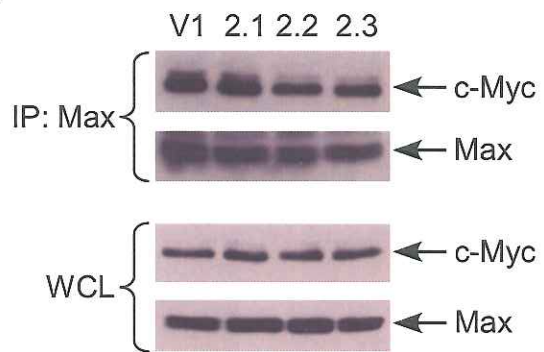

Supplement: NIHMS310033-supplement-SF6.pdf [file NIHMS310033-supplement-SF6.pdf]
